# Supplementary material for: Sox2 and FGF20 interact to regulate organ of Corti hair cell and supporting cell development in a spatially-graded manner
Source: PLoS Genet. 2019 Jul 5;15(7):e1008254. doi: 10.1371/journal.pgen.1008254 (PMC6636783; doi:10.1371/journal.pgen.1008254)
Supplement: S1 File — (XLSX) [file pgen.1008254.s011.xlsx]

## Sheet: Legend
Numerical data underlying graphs
Length	length of cochlear duct in micron
Total_IHC	inner hair cell number
Total_OHC	outer hair cell number
Total_SC	supporting cell number
IHC_100	IHCs per 100 micron
OHC_100	OHCs per 100 micron
SC_100	SCs per 100 micron
IHC_base	IHCs per 100 micron in the basal turn of cochlea
IHC_mid	IHCs per 100 micron in the middle turn of cochlea
IHC_apex	IHCs per 100 micron in the apical turn of cochlea
OHC_base	OHCs per 100 micron in the basal turn of cochlea
OHC_mid	OHCs per 100 micron in the middle turn of cochlea
OHC_apex	OHCs per 100 micron in the apical turn of cochlea
SC_base	SCs per 100 micron in the basal turn of cochlea
SC_mid	SCs per 100 micron in the middle turn of cochlea
SC_apex	SCs per 100 micron in the apical turn of cochlea

## Sheet: Fig 1 & S1
Genotype	Length		Genotype	Total_IHC	Total_OHC	IHC_100	OHC_100	IHC_base	IHC_mid	IHC_apex	OHC_base	OHC_mid	OHC_apex		Genotype	Total_SC	SC_100	SC_base	SC_mid	SC_mid
Foxg1cre_Fgfr1flox/-	4078		Foxg1cre_Fgfr1flox/-	361	54	8.85238	1.32418	7.72437	8.60716	10.2256	3.53114	0.367827	0.0735655		Foxg1cre_Fgfr1flox/-	727	20.9209	25.7266	16.2302	20.8058
Foxg1cre_Fgfr1flox/-	4394		Foxg1cre_Fgfr1flox/-	413	71	9.39918	1.61584	8.05644	11.1288	9.01229	4.77924	0	0.0682749		Foxg1cre_Fgfr1flox/-	669	16.7459	27.5594	12.5407	10.1377
Foxg1cre_Fgfr1flox/-	4125		Foxg1cre_Fgfr1flox/-	287	52	6.95758	1.26061	6.69091	8.36364	5.81818	3.34545	0.436364	0		Foxg1cre_Fgfr1flox/-	553	13.4321	20.7675	13.6993	5.82949
Foxg1cre_Fgfr1flox/-	4402		Foxg1cre_Fgfr1flox/-	341	46	7.74648	1.04498	6.95139	8.58701	7.70104	2.99864	0.136302	0		Foxg1cre_Fgfr1flox/-	400	9.57396	17.4485	7.89852	3.37482
Foxg1cre_Fgfr1flox/-	3897		Foxg1cre_Fgfr1flox/-	371	38	9.52014	0.975109	7.92918	9.31486	11.3164	2.69438	0.230947	0		Foxg1cre_Fgfr1flox/+	3586	65.3783	62.0237	76.7366	57.3747
Foxg1cre_Fgfr1flox/-	3700		Foxg1cre_Fgfr1flox/-	322	58	8.7027	1.56757	7.37838	7.94595	10.7838	4.13514	0.486486	0.0810811		Foxg1cre_Fgfr1flox/+	3670	67.3024	59.3068	69.7047	72.8957
Foxg1cre_Fgfr1flox/-	3475		Foxg1cre_Fgfr1flox/+	560	1924	10.4575	35.929	9.85994	11.4286	10.084	32.0448	38.3193	37.423		Foxg1cre_Fgfr1flox/+	3738	63.6906	62.6171	66.2464	62.2082
Foxg1cre_Fgfr1flox/-	3995		Foxg1cre_Fgfr1flox/+	593	1973	10.0765	33.5259	9.7876	11.5208	8.92099	30.8921	37.0603	32.6253		Foxg1cre_Fgfr1flox/+	3830	67.9922	65.134	79.8864	58.9562
Foxg1cre_Fgfr1flox/-	4117		Foxg1cre_Fgfr1flox/+	589	2044	10.2524	35.5788	9.34726	10.7572	10.6527	32.2193	36.9713	37.5457		Fgfr1flox/-	3521	64.4518	61.6694	66.3921	65.2938
Foxg1cre_Fgfr1flox/-	4178		Fgfr1flox/-	597	1935	10.4389	33.8346	9.70449	10.9635	10.6487	29.1659	35.7755	36.5623		Fgfr1flox/-	3742	63.0391	62.8201	71.715	54.5822
Foxg1cre_Fgfr1flox/+	5355		Fgfr1flox/-	615	1906	11.391	35.3028	10.8909	12.7246	10.5575	31.7837	38.8961	35.2287		Fgfr1flox/-	3518	62.5311	64.2552	66.5482	56.7899
Foxg1cre_Fgfr1flox/+	5885		Fgfr1flox/-	586	1984	10.5018	35.5556	9.67742	11.3441	10.4839	31.4516	37.1505	38.0645		Fgfr1flox/+	4218	67.2191	68.7968	73.7211	59.1394
Foxg1cre_Fgfr1flox/+	5745		Fgfr1flox/+	664	2316	10.9175	38.0796	10.3584	11.6902	10.7037	34.1828	39.8553	40.2006		Fgfr1flox/+	4263	70.046	61.4197	76.7992	71.9192
Foxg1cre_Fgfr1flox/+	5485		Fgfr1flox/+	641	2161	10.9911	37.0542	10.5453	12.2942	10.1337	35.0823	40.9979	35.0823		Fgfr1flox/+	4547	72.0146	68.4669	80.2027	67.3741
Foxg1cre_Fgfr1flox/+	5453		Fgfr1flox/+	659	2277	10.7399	37.1089	9.87614	12.0763	10.2673	33.002	40.7269	37.5978
Foxg1cre_Fgfr1flox/+	5869		Fgfr1flox/+	634	2115	10.5579	35.2206	10.4413	11.5404	9.69192	33.7219	37.219	34.7211
Foxg1cre_Fgfr1flox/+	5633
Fgfr1flox/-	5719
Fgfr1flox/-	5399
Fgfr1flox/-	5580
Fgfr1flox/-	5463
Fgfr1flox/-	5936
Fgfr1flox/-	5626
Fgfr1flox/+	6082
Fgfr1flox/+	5832
Fgfr1flox/+	6136
Fgfr1flox/+	6005
Fgfr1flox/+	6275
Fgfr1flox/+	6086
Fgfr1flox/+	6314
Genotype	Length		Genotype	Total_IHC	Total_OHC	IHC_100	OHC_100	IHC_base	IHC_mid	IHC_apex	OHC_base	OHC_mid	OHC_apex		Genotype	Total_SC	SC_100	SC_base	SC_mid	SC_apex
Fgf20+/-	5710		Fgf20+/-	614	2071	11.3851	38.4016	10.013	11.9599	12.1825	33.6547	40.5526	40.9976		Fgf20+/-	4024	70.4729	68.0911	74.711	68.6165
Fgf20+/-	6023		Fgf20+/-	707	2325	11.9668	39.3534	11.8314	12.4915	11.5775	39.2011	41.0799	37.7793		Fgf20+/-	4352	72.2564	68.4377	79.0968	69.2346
Fgf20+/-	6033		Fgf20+/-	645	2211	11.1882	38.3521	10.0434	12.229	11.2923	32.9402	42.0468	40.0694		Fgf20+/-	4028	66.7661	61.9592	71.8051	66.5341
Fgf20+/-	5880		Fgf20-/-	694	486	13.8856	9.72389	11.8848	13.9856	15.7863	15.4862	4.68187	9.0036		Fgf20+/-	4216	71.7007	66.0714	75.4082	73.6224
Fgf20-/-	5135		Fgf20-/-	676	569	12.2619	10.3211	10.8289	12.4615	13.4954	15.019	6.85652	9.08761		Fgf20-/-	1658	32.2882	35.6962	28.0428	33.1256
Fgf20-/-	5414		Fgf20-/-	703	535	13.8386	10.5315	12.2835	13.5827	15.6496	12.7559	7.85433	10.9843		Fgf20-/-	1692	31.2523	34.9649	25.8774	32.9147
Fgf20-/-	4907		Fgf20-/-	752	491	13.1423	8.58092	11.4296	14.2607	13.7365	12.4782	4.71863	8.54596		Fgf20-/-	1696	34.5629	33.6254	32.2193	37.8439
Fgf20-/-	5351														Fgf20-/-	1799	33.6199	35.2084	28.5367	37.1146
Fgf20-/-	4861														Fgf20-/-	1736	35.7128	39.3129	30.4876	37.338

## Sheet: Fig S3
E13.5-E15.5 Dox										E13.5-E15.5 Dox
Genotype	IHC_apex	OHC_apex	IHC_mid	OHC_mid	IHC_base	OHC_base	IHC_100	OHC_100		Genotype	SC_apex	SC_mid	SC_base	SC_100
Fgf20-het	11.8252	41.9023	12.5748	39.521	10.5263	34.2105	11.5688	38.3874		Fgf20-het	82.9333	69.8113	66.7692	73.3096
Fgf20-het	12.5874	41.7249	12.1037	37.1758	10.625	34.375	11.8613	38.1387		Fgf20-het	84.2391	80.8108	72.3404	79.3815
Fgf20-het	12.1654	41.6058	13.2812	40.1042	10.804	35.9297	12.0704	39.2288		Fgf20-het	81.0734	72.8658	68.8144	74.1121
Fgf20-het	11.8156	37.464	13.0435	37.8517	11	37	11.9508	37.4341		Fgf9-OA	69.1244	77.8125	66.2592	70.5073
Fgf20-het	12.5382	38.5321	10.6538	36.3196	10	36.25	11.0377	36.9811		Fgf9-OA	66.9118	71.3904	70.4961	69.5279
Fgf20-het	11.4286	39.4286	11.1979	36.4583	9.14286	33.1429	10.6089	36.3469		Fgf9-OA	84.8485	79.9492	72.6708	79.2543
Fgf20-het	11.1111	37.5	11.5385	38.2051	16.208	33.9449	12.8134	36.676		Fgf9-OA	70.297	61.7021	65.1515	65.8559
Fgf9-OA	9.66851	34.2541	9.66851	34.2541	12.5	29.7619	10.566	32.8302		Fgf20-null	15.3247	25.2427	29.912	23.2865
Fgf9-OA	12.8851	44.8179	11.3208	39.3531	10.5714	34.5714	11.5955	39.6104		Fgf20-null	17.3333	24.924	18.1818	20.0391
Fgf9-OA	11.6456	41.2658	10.7438	36.9146	10.5572	37.8299	11.01	38.7625		Fgf20-null	24.5179	28.1928	25.5556	26.1863
Fgf9-OA	10.2804	33.6449	11.6402	37.037	10.1156	32.0809	10.7177	34.3541		Fgf20-null	33.7349	36.9412	42.0245	37.2213
Fgf9-OA	11.6767	38.9222	10.9333	41.3333	9.1195	32.3899	10.6134	37.7799		Fgf20-null	26.6254	34.9544	37.1951	32.9592
Fgf20-null	17.3252	3.64742	16.4134	8.51064	12.8947	18.1579	15.4143	10.501		Fgf9-rescue	78.2082	76.2463	70.8075	75.3718
Fgf20-null	15.2062	15.7217	12.7424	14.9584	13.1098	11.2805	13.7419	14.1133		Fgf9-rescue	70.9302	67.5926	65.8228	68.0151
Fgf20-null	14.4772	14.2091	15.4321	14.5062	17.1254	19.8777	15.625	16.1133		Fgf9-rescue	84.2262	86.0092	78.4483	83.125
Fgf20-null	15.2231	16.273	13.1148	13.6612	10.7143	18.75	13.1117	16.1588
Fgf20-null	14.3229	7.8125	13.2211	9.85577	12.7119	16.9491	13.4315	11.3518
Fgf9-rescue	12.4654	43.7673	13.6752	45.0142	12.5392	41.0658	12.9001	43.356
Fgf9-rescue	12.3077	40	13.3333	40.7692	12.2951	37.7049	12.6735	39.5005
Fgf9-rescue	12.6543	42.5926	13.217	40.6484	12.3839	35.9133	12.7863	39.7901
Fgf9-rescue	13.5371	41.4847	12.3077	40.6154	10.9333	35.4667	12.3489	39.2919
Fgf9-rescue	11.4441	39.2371	12.4224	41.6149	13.0564	39.4659	12.2807	40.0585
Fgf9-rescue	11.6564	39.2638	12.2396	39.8438	11.4907	33.2298	11.8217	37.5969
Fgf9-rescue	11.3703	35.5685	11.1765	38.8235	10.7463	36.1194	11.1002	36.8369
E13.5 Dox										E13.5 Dox
Genotype	IHC_apex	OHC_apex	IHC_mid	OHC_mid	IHC_base	OHC_base	IHC_100	OHC_100		Genotype	SC_apex	SC_mid	SC_base	SC_100
Fgf20-het	11.0169	39.8305	11.6071	37.7976	11.2392	39.4813	11.2826	39.055		Fgf20-het	46.9136	70.1183	76.9663	65.1277
Fgf20-het	12.8641	39.8058	14.0187	44.5483	12.1212	41.1616	12.9318	41.6298		Fgf20-het	100	89.9497	85.5072	91.7127
Fgf20-het	14.5455	43.9394	12.8571	40.5714	10.9718	34.4828	12.8128	39.7397		Fgf20-het	93.0233	78.6111	88.7324	86.6856
Fgf9-OA	11.1111	39.1414	12.1875	35.3125	10.1449	35.7488	11.0619	36.8142		Fgf9-OA	179.079	88.1503	79.2169	108.615
Fgf9-OA	12.3656	40.8602	12.7726	37.6947	11.9266	38.2263	12.3529	39.0196		Fgf9-OA	84.0782	75.0769	71.7718	77.1654
Fgf9-OA	13	39.75	13.2231	40.4959	11.7978	35.9551	12.6899	38.7846		Fgf9-OA	89.6714	89.071	72.1312	83.9378
Fgf9-OA	12.2754	38.0239	12.4324	39.4595	11.5578	37.6884	12.069	38.3847		Fgf9-OA	81.6667	70.6573	76.6585	76.2969
Fgf20-null	13.3136	7.39645	13.2231	11.0193	12.6506	21.3855	13.0687	13.1655		Fgf9-OA	76.3496	98.2639	72.9483	81.5109
Fgf20-null	13.1098	13.1098	15.0538	13.9785	12.8141	16.5829	13.6612	14.663		Fgf9-OA	88.2353	77.3842	76.1273	80.3506
Fgf20-null	10.5392	10.7843	16.4649	15.4964	11.5152	24.5454	12.9453	16.4205		Fgf20-null	39.1204	39.3443	52.9412	43.1757
Fgf20-null	13.0435	12.7536	14.6893	16.9491	10.5714	25.4286	12.7741	18.3985		Fgf20-null	43.2432	48.01	46.9027	46.1825
Fgf9-rescue	18.5841	36.5782	15.3247	34.8052	13.5294	36.1765	15.7895	35.8083		Fgf20-null	41.4201	44.5977	42.73	43.0631
Fgf9-rescue	18.0233	27.6163	15.4242	32.9049	11.7347	37.7551	14.9333	32.9778		Fgf9-rescue	67.013	74.6518	69.7674	70.3802
Fgf9-rescue	15.6626	31.9277	14.0244	35.061	12.3077	44	14.0101	36.9543		Fgf9-rescue	70.3704	69.4444	76.9663	72.4104
Fgf9-rescue	14.759	37.6506	14.956	43.1085	13.4969	39.2638	14.4144	40.04		Fgf9-rescue	53.3854	72.4599	69.7969	65.191
										Fgf9-rescue	67.7326	76.3533	69.086	71.0403
										Fgf9-rescue	74.6231	60.0939	72.9483	68.7771
E14.5 Dox										E14.5 Dox
Genotype	IHC_apex	OHC_apex	IHC_mid	OHC_mid	IHC_base	OHC_base	IHC_100	OHC_100		Genotype	SC_apex	SC_mid	SC_base	SC_100
Fgf20-het	11.4369	38.7097	12.381	37.8571	11.276	33.8279	11.7486	36.8852		Fgf20-het	88.5086	78.7172	72.5989	80.3798
Fgf20-het	16.7364	51.4644	12	38.6667	11.6945	39.6181	12.9719	42.0136		Fgf20-het	75.6677	74.0964	68.9655	72.7533
Fgf20-het	13.7441	41.7062	12.069	39.3678	10.7246	35.3623	12.287	39.0134		Fgf20-het	53.3666	68.9487	64.4118	62.1739
Fgf9-OA	13.1646	46.3291	11.509	39.3862	8.80682	36.3636	11.2478	40.8612		Fgf20-het	66.0274	62.2291	69.1643	65.8937
Fgf9-OA	12.6344	40.8602	11.1111	37.3457	9.74212	34.6705	11.1962	37.7034		Fgf9-OA	67.2727	79.3846	68.9076	71.7391
Fgf9-OA	13.5065	45.1948	13.4557	43.4251	10.355	35.503	12.4762	41.5238		Fgf9-OA	86.5435	64.5963	65.0794	72.4745
Fgf20-null	7.07692	10.7692	8.4507	7.277	10.2703	17.027	8.65299	11.5076		Fgf9-OA	81.9512	75.3754	65.0259	74.225
Fgf20-null	16.6154	7.69231	12.4378	8.95522	11.875	21.5625	13.5626	12.4164		Fgf9-OA	77.3438	68.5504	56.7164	68.0284
Fgf20-null	10.7034	7.95107	11.3095	4.7619	7.07692	18.1538	9.7166	10.2227		Fgf20-null	35.6436	32.1937	52.3077	39.537
Fgf20-null	13.6126	9.94764	12.4366	14.9746	12.0548	12.3288	12.7081	12.4452		Fgf20-null	31.9905	44.5783	26.0652	33.5646
Fgf9-rescue	9.77012	41.3793	10	32.1053	10.1796	23.9521	9.98117	32.58		Fgf20-null	31.1392	29.5812	40	33.3333
Fgf9-rescue	14.25	43	11.7284	42.2839	10.8247	33.2474	12.3201	39.3885		Fgf20-null	27.2727	23.43	25.0738	25.2197
Fgf9-rescue	11.7188	34.8958	10.8108	30.3303	10.3211	26.1468	10.928	30.2689		Fgf20-null	23.8961	24.8677	32.2404	26.9265
Fgf9-rescue	15.4762	44.9405	13.3838	40.404	11.6208	34.2508	13.5033	39.9433		Fgf9-rescue	36.5915	55.2846	60.3674	50.4787
Fgf9-rescue	14.3293	44.2073	13.3152	37.2283	10.7692	20.6154	12.8306	34.1822		Fgf9-rescue	76.1773	66.9643	58.6006	67.4039
										Fgf9-rescue	48.6647	47.0588	31.9277	42.6165
										Fgf9-rescue	50.5263	59.8972	33.1343	48.5507
E15.5 Dox										E15.5 Dox
Genotype	IHC_apex	OHC_apex	IHC_mid	OHC_mid	IHC_base	OHC_base	IHC_100	OHC_100		Genotype	SC_apex	SC_mid	SC_base	SC_100
Fgf20-het	11.5502	37.9939	13.5593	42.1307	10.1333	37.3333	11.8174	39.3017		Fgf20-het	74.4928	70.0581	66.3291	70.1107
Fgf20-het	11.9534	40.8163	13.0319	40.1596	12.6214	38.8349	12.5553	39.8762		Fgf20-het	77.9221	86.9697	70.679	78.5371
Fgf20-het	12.3457	39.8148	12.5	38.6628	10.1235	34.8148	11.5564	37.5583		Fgf20-het	82.2535	77.9037	79.7333	79.9631
Fgf20-het	13.1868	41.2088	13.5135	40.2402	10.7143	39.011	12.4411	40.1508		Fgf20-het	75.8523	68.1416	68.3698	70.6897
Fgf20-het	12.5333	41.8667	11.8012	36.9565	10.0543	33.6957	11.4554	37.5587		Fgf20-het	79.8781	80.6916	67.2087	75.6705
Fgf20-het	12.3167	39.0029	11.5502	7.29483	9.87654	32.0988	11.2676	26.2575		Fgf9-OA	66.2088	76.5432	67.9144	69.9623
Fgf9-OA	10.8504	37.2434	12.3123	45.6457	8.41837	36.7347	10.4128	39.681		Fgf9-OA	69.2708	64.4022	63.5097	65.7966
Fgf9-OA	12.1813	39.3768	12.2302	36.4508	11.4428	31.592	11.9454	35.6655		Fgf9-OA	77.8761	75.0769	68.3891	74.2315
Fgf9-OA	12.3457	46.2963	11.8644	39.2655	10.6583	36.0502	11.6349	40.5216		Fgf9-OA	76.2178	77.0115	64.7368	72.4234
Fgf9-OA	17.3296	54.2614	16.5138	53.5168	15.0888	44.6746	16.3225	50.8358		Fgf20-null	39.8176	33.2344	38.9313	37.3938
Fgf20-null	12.6935	12.6935	13.8122	14.9171	12.6935	20.743	13.0952	16.0714		Fgf20-null	29.683	38.2436	38.9571	35.575
Fgf20-null	12.963	10.1852	12.9496	10.7914	11.579	21.5789	12.4888	14.273		Fgf20-null	25.2941	30.4734	34.7181	30.1478
Fgf20-null	14.6789	8.25688	13.2353	17.6471	11.4667	16	13.0518	14.1075		Fgf20-null	28.9326	28.7879	41	33.3333
Fgf9-rescue	11.4035	26.6082	12.6168	12.8505	11.8863	22.739	12.0138	20.2247		Fgf20-null	24.8555	24.6499	43.5976	30.7468
Fgf9-rescue	15.8654	35.3365	11.0193	14.0496	12.0098	12.5	13.0581	20.9773		Fgf9-rescue	60.241	45.202	37.5375	48.4266
Fgf9-rescue	14.956	24.9267	12.9114	11.1392	11.2149	19.0031	13.0558	17.9754		Fgf9-rescue	56.7164	41.5663	32.9897	44.0285
Fgf9-rescue	11.9701	28.6783	12	22.1538	10.9195	11.4942	11.6387	21.1359		Fgf9-rescue	56.4885	34.0425	26.969	39.1762
Fgf9-rescue	14.0351	30.4094	12.3529	15.5882	10.2941	12.5	12.1101	19.0826		Fgf9-rescue	47.8386	31.2227	35.4037	37.5333
Fgf9-rescue	14.2045	36.3636	15.0307	15.9509	13.8037	11.6564	14.3426	21.7131

## Sheet: Fig 4 & S4
Genotype	Length		Genotype	Total_IHC	Total_OHC	IHC_100	OHC_100	IHC_base	IHC_mid	IHC_apex	OHC_base	OHC_mid	OHC_apex		Genotype	Total_SC	SC_100	SC_base	SC_mid	SC_apex
Sox2+/+	6732		Sox2+/+	650	2200	11.3024	38.2542	11.1111	12.7282	10.0678	37.4544	43.7663	33.542		Sox2+/+	4299	63.8592	64.4385	75.6239	51.5152
Sox2+/+	5997.5		Sox2+/+	679	2270	10.4671	34.9931	10.6367	12.5328	8.23185	33.7598	41.8529	29.3664		Sox2+/+	4453	74.9411	70.6833	85.6277	68.5123
Sox2+/+	5751		Sox2+/+	654	2348	9.66312	34.6927	10.1507	10.6826	8.15603	33.9982	38.2092	31.8706		Sox2+/+	4340	68.1105	65.0659	76.742	62.5235
Sox2+/+	6372		Sox2+/+	706	2405	10.3824	35.3676	9.88235	11.6471	9.61765	32.25	40.5	33.3529		Sox2+/+	4635	68.6158	63.9082	76.7432	65.1962
Sox2+/+	6768		Sox2ysb/+	681	2211	14.361	46.6259	12.7162	16.1324	14.2345	41.6913	51.1177	47.0687		Sox2ysb/+	4067	64.7611	65.9713	78.2484	50.0637
Sox2+/+	6800		Sox2ysb/+	688	2277	11.251	37.2363	11.1365	13.0008	9.6157	33.8021	41.6026	36.3042		Sox2ysb/+	4091	62.8998	60.4244	74.2159	54.059
Sox2+/+	6755		Sox2ysb/+	793	2313	11.8535	34.574	10.852	13.139	11.5695	31.2108	37.9372	34.574		Sox2ysb/+	3938	58.5663	56.7519	72.5015	46.4456
Sox2ysb/+	6280		Sox2ysb/+	778	2287	13.1242	38.5796	12.2976	15.1822	11.8927	34.413	44.3826	36.9433		Sox2ysb/+	3871	59.9133	60.5015	68.8129	50.4256
Sox2ysb/+	4742		Sox2ysb/ysb	454	1352	9.08727	27.0616	5.88471	13.2706	8.10649	24.0192	31.1049	26.0608		Sox2ysb/+	4123	64.4823	64.2321	72.5837	56.6312
Sox2ysb/+	6115		Sox2ysb/ysb	492	1176	10.8061	25.8291	8.10455	15.6161	8.69756	24.0501	30.5732	22.864		Sox2ysb/ysb	2620	52.9507	51.2328	60.7518	46.8674
Sox2ysb/+	6690		Sox2ysb/ysb	693	1546	13.9943	31.2197	8.66317	19.3255	13.9943	28.5945	35.1979	29.8667		Sox2ysb/ysb	2762	54.1675	50.1863	58.8351	53.4811
Sox2ysb/+	5928		Sox2ysb/ysb	846	1452	16.6732	28.6165	15.2542	21.3441	13.4214	30.6858	31.5136	23.65		Sox2ysb/ysb	2959	58.9207	52.8674	70.7288	53.1661
Sox2ysb/+	6310		Sox2ysb/-	213	253	5.64388	6.70376	0.63593	3.81558	12.4801	1.11288	4.68998	14.3084		Sox2ysb/-	69	2.05602	0	0	6.16806
Sox2ysb/+	6394		Sox2ysb/-	127	189	3.78765	5.63674	0.536833	1.87891	8.94721	1.25261	1.52103	14.1366		Sox2ysb/-	102	3.05206	1.8851	1.52603	5.74506
Sox2ysb/ysb	4996		Sox2ysb/-	228	138	6.00158	3.63253	0.710713	4.97499	12.319	1.50039	1.50039	7.89681		Sox2ysb/-	83	2.42053	2.88714	0.0874891	4.28696
Sox2ysb/ysb	4676		Sox2ysb/-	99	36	2.87707	1.04621	0	2.26678	6.36443	0	0.087184	3.05144
Sox2ysb/ysb	4553
Sox2ysb/ysb	4793
Sox2ysb/ysb	4952
Sox2ysb/ysb	5074
Sox2ysb/ysb	5099
Sox2ysb/ysb	5022
Sox2ysb/-	3774
Sox2ysb/-	3417
Sox2ysb/-	3353
Sox2ysb/-	3457
Sox2ysb/-	3799
Sox2ysb/-	3342
Sox2ysb/-	3441
Sox2ysb/-	3429

## Sheet: Fig 6
Genotype	Ki67+/Sox2+ cells
Fgf20+/-	0
Fgf20+/-	1
Fgf20+/-	2
Fgf20+/-	2
Fgf20-/-	3
Fgf20-/-	1
Fgf20-/-	2
Fgf20-/-	4
Foxg1cre_Fgfr1flox/+	1
Foxg1cre_Fgfr1flox/+	1
Foxg1cre_Fgfr1flox/+	9
Foxg1cre_Fgfr1flox/+	4
Foxg1cre_Fgfr1flox/+	8
Foxg1cre_Fgfr1flox/-	19
Foxg1cre_Fgfr1flox/-	14
Foxg1cre_Fgfr1flox/-	18
Foxg1cre_Fgfr1flox/-	15
Foxg1cre_Fgfr1flox/-	26

## Sheet: Fig 8 & S7
Fgf20_genotype	Sox2_genotype	Length		Fgf20_genotype	Sox2_genotype	Total_IHC	Total_OHC	IHC_100	OHC_100	IHC_base	IHC_mid	IHC_apex	OHC_base	OHC_mid	OHC_apex		Fgf20_genotype	Sox2_genotype	Total_SC	SC_100	SC_base	SC_mid	SC_apex
+/+	+/+	6743		+/+	+/+	667	2291	9.62482	33.0592	9.22078	10.9957	8.65801	30.9524	37.4026	30.8225		+/+	+/+	4655	71.4341	65.2344	81.5315	67.5363
+/+	+/+	6516.5		+/+	+/+	699	2443	11.738	41.0243	10.9824	12.9471	11.2846	38.136	45.8942	39.0428		+/+	+/+	4442	71.6163	64.5707	82.0798	68.1983
+/+	+/+	6371		+/+	+/+	731	2398	11.4739	37.6393	10.3124	12.5726	11.5367	32.8677	42.3795	37.6707		+/+	+/+	4362	68.1509	65.573	65.0574	73.8224
+/+	+/+	6038		+/+	+/+	693	2350	11.4773	38.9202	10.9805	12.5207	10.9308	36.1212	41.7357	38.9036		+/+	+/+	4530	72.3642	65.0319	79.6006	72.4601
+/+	+/+	6569		+/+	+/+	700	2371	10.6561	36.0938	9.91018	11.9196	10.1385	33.2471	39.6864	35.3478		+/-	+/+	4139	75.2135	70.0527	85.2626	70.3253
+/-	+/+	6253		+/-	+/+	719	2349	11.4985	37.566	11.6104	12.426	10.459	37.7099	40.1087	34.8793		+/-	+/+	4003	63.6255	64.1818	68.2826	58.4121
+/-	+/+	6359		+/-	+/+	693	2347	10.8979	36.9083	11.181	11.4641	10.0487	36.468	38.4966	35.7603		+/-	+/+	4196	66.7568	62.143	70.0183	68.1091
+/-	+/+	6527		+/-	+/+	709	2289	10.8626	35.0697	10.4795	11.8584	10.2497	33.461	38.6548	33.0933		+/+	ysb/+	4493	72.3394	67.3322	79.6973	69.9887
+/-	+/+	6296		+/-	+/+	725	2250	11.5152	35.737	11.2452	12.7224	10.5781	33.4498	40.216	33.5451		+/+	ysb/+	4147	68.7614	64.6161	75.2114	66.4566
+/-	+/+	6285.5		+/-	+/+	667	2242	9.69759	32.5967	8.94155	10.3373	9.8139	29.7906	34.8502	33.1492		+/+	ysb/+	4436	66.2436	60.3002	74.0536	64.3769
+/+	ysb/+	6272		+/+	ysb/+	751	2388	11.9739	38.074	10.9534	13.9668	11.0013	32.1429	41.3265	40.7526		+/+	ysb/+	4113	60.7219	61.3863	65.9039	54.8756
+/+	ysb/+	6031		+/+	ysb/+	746	2299	11.5929	35.7265	11.6084	13.38	9.79021	32.7739	38.8811	35.5245		+/+	ysb/+	4300	63.1842	59.0699	69.2087	61.274
+/+	ysb/+	6753		+/+	ysb/+	759	2438	11.2394	36.1025	11.6393	12.0391	10.04	34.3847	38.0275	35.8952		+/-	ysb/+	3774	63.7823	64.4921	69.8665	56.9883
+/+	ysb/+	6842		+/+	ysb/+	705	2388	10.304	34.9021	10.6109	10.3479	9.95323	31.5259	36.349	36.8313		+/-	ysb/+	3651	58.3786	59.1941	65.8139	50.1279
+/+	ysb/+	6948		+/+	ysb/+	686	2263	10.851	35.7956	10.2499	11.5786	10.7245	33.3597	36.8238	37.2034		+/-	ysb/+	3547	66.5354	72.5943	76.5335	50.4783
+/+	ysb/+	6322		+/-	ysb/+	754	2172	12.4013	35.7237	11.0033	14.3092	11.8914	31.8257	40.3125	35.0329		+/+	ysb/ysb	2721	53.9506	51.8093	68.5833	41.4593
+/-	ysb/+	6080		+/-	ysb/+	699	2141	11.5157	35.2718	11.7628	12.9489	9.83526	35.5354	39.7858	30.4942		+/+	ysb/ysb	2583	56.0547	41.6016	69.9219	56.6406
+/-	ysb/+	5917		+/-	ysb/+	787	2152	12.9228	35.3366	12.8079	14.335	11.6256	34.4828	40.197	31.33		+/+	ysb/ysb	2464	56.1531	50.5242	67.3428	50.5925
+/-	ysb/+	6070		+/-	ysb/+	718	2109	12.9021	37.8976	12.8302	15.31	10.566	37.1968	44.097	32.3989		+/-	ysb/ysb	1879	43.5963	44.7564	49.0719	36.9606
+/-	ysb/+	6090		+/+	ysb/ysb	582	1341	12.5323	28.876	7.68734	16.2145	13.6951	25.969	29.7804	30.8786		+/-	ysb/ysb	1680	42.5101	40.6883	48.8107	38.0314
+/-	ysb/+	5565		+/+	ysb/ysb	563	1266	12.0094	27.0051	7.61519	15.9983	12.4147	23.2295	29.9488	27.837		+/-	ysb/ysb	2047	53.3212	49.7004	61.1878	49.0753
+/-	ysb/+	5331		+/+	ysb/ysb	586	1383	12.4205	29.3133	9.41077	15.8966	11.9542	27.978	31.9203	28.0415		-/-	+/+	1817	38.8206	37.6883	37.8165	40.9572
+/+	ysb/ysb	5043.5		+/+	ysb/ysb	629	1501	13.1178	31.3034	8.94682	17.268	13.1387	31.7205	33.7226	28.4672		-/-	+/+	1565	31.929	27.7262	31.521	36.5398
+/+	ysb/ysb	4644		+/-	ysb/ysb	699	773	17.0156	18.8169	9.20156	21.2512	20.594	11.6115	20.813	24.0263		-/-	+/+	1601	33.755	36.5591	30.4238	34.2821
+/+	ysb/ysb	4688		+/-	ysb/ysb	657	967	15.6429	23.0238	11.6429	19.0714	16.2143	25.6429	23.7143	19.7143		-/-	ysb/+	1249	22.7878	28.8998	25.5063	13.9573
+/+	ysb/ysb	4718		+/-	ysb/ysb	706	1013	13.7568	19.7389	10.0546	18.18	13.0359	19.1154	22.1551	17.9462		-/-	ysb/+	1570	36.8026	35.3024	34.9508	40.1547
+/+	ysb/ysb	4795		+/-	ysb/ysb	604	818	16.1024	21.8075	9.59744	20.4745	18.2351	22.394	16.8755	26.153		-/-	ysb/+	1446	32.407	29.9193	33.7517	33.55
+/+	ysb/ysb	4388		-/-	+/+	745	322	15.3324	6.62688	12.9656	16.0527	16.9788	12.8421	2.71661	4.32188		-/-	ysb/+	1912	34.3576	38.0054	34.0162	31.0512
+/-	ysb/ysb	4108		-/-	+/+	742	726	14.6265	14.3111	12.2413	15.4938	16.1443	17.9775	11.236	13.7197		-/-	ysb/+	1259	24.638	28.4149	26.4775	19.0215
+/-	ysb/ysb	4200		-/-	+/+	834	542	15.5249	10.0894	12.6768	15.4133	18.4847	12.6768	6.14296	11.4483		-/-	ysb/ysb	256	6.84126	0	6.33351	14.1903
+/-	ysb/ysb	5132		-/-	+/+	704	498	13.6805	9.67742	12.0676	13.5251	15.4489	15.6238	9.03614	4.37233		-/-	ysb/ysb	119	3.42249	0	1.3805	8.88697
+/-	ysb/ysb	3751		-/-	ysb/+	691	252	12.1999	4.44915	12.0763	14.9894	9.5339	9.95763	3.01907	0.370763		-/-	ysb/ysb	583	15.0335	4.48685	10.3662	30.2476
+/-	ysb/ysb	3952		-/-	ysb/+	682	146	12.5023	2.67644	11.439	14.7938	11.2741	6.15949	1.48488	0.384968		-/-	ysb/ysb	397	11.7874	0.97981	9.7981	24.5843
+/-	ysb/ysb	3839		-/-	ysb/+	711	135	11.7871	2.23806	11.0411	13.7268	10.5935	5.91844	0.596817	0.198939		-/-	ysb/ysb	519	14.6527	8.97798	3.55731	31.4229
-/-	+/+	4859		-/-	ysb/+	682	148	13.0978	2.84233	10.313	16.3626	12.6176	5.93432	2.13175	0.460918
-/-	+/+	5073		-/-	ysb/+	645	320	11.3616	5.63678	10.5161	13.4754	10.0934	9.45922	5.0731	2.37802
-/-	+/+	4901.5		-/-	ysb/ysb	262	2	7.27576	0.0555401	1.58289	8.91419	11.3302	0	0.16662	0
-/-	+/+	4743		-/-	ysb/ysb	222	0	4.81875	0	1.17213	5.14435	8.13979	0	0	0
-/-	ysb/+	5664		-/-	ysb/ysb	260	1	6.51139	0.0250438	1.72802	4.35763	13.4485	0	0	0.0751315
-/-	ysb/+	5455		-/-	ysb/ysb	102	0	2.73166	0	1.44617	1.92823	4.82057	0	0	0
-/-	ysb/+	4266		-/-	ysb/ysb	364	132	10.1704	3.68818	3.18525	8.80134	18.5247	0.754401	2.43085	7.8793
-/-	ysb/+	4462		-/-	ysb/ysb	376	64	10.1814	1.73301	2.59951	10.0731	17.8716	0.406174	1.78716	3.00569
-/-	ysb/+	5565
-/-	ysb/+	5992
-/-	ysb/+	5110
-/-	ysb/+	6032
-/-	ysb/+	5207
-/-	ysb/+	5677
-/-	ysb/ysb	3601
-/-	ysb/ysb	4607
-/-	ysb/ysb	3993
-/-	ysb/ysb	3742
-/-	ysb/ysb	3477
-/-	ysb/ysb	3734
-/-	ysb/ysb	3579
-/-	ysb/ysb	3693
-/-	ysb/ysb	3368
-/-	ysb/ysb	3542

## Sheet: Fig S9
Fgf20	Sox2	Length	Total_HC	HC_100	HC_base	HC_mid	HC_apex
+/+	+/+	6365	3028	47.5727	42.1367	53.0715	47.5098
+/+	+/+	6218	2866	46.092	43.8565	50.2734	44.146
+/+	+/+	6039	2911	48.2033	45.3552	53.6016	45.6533
+/+	+/+	6694	3042	45.4437	43.8303	48.3567	44.144
+/+	+/+	6221	2960	47.5808	44.173	49.1882	49.3811
+/-	+/+	6489	2925	45.0763	43.3195	48.5437	43.3657
+/-	+/+	5922	2845	48.0412	45.998	53.2421	44.8835
+/-	+/+	6166	2981	48.3458	43.3993	50.3568	51.2812
+/+	+/-	6564	2890	44.028	40.6307	47.7148	43.7386
+/+	+/-	6249	2941	47.0635	40.9506	51.2722	48.9678
+/+	+/-	6347	3150	49.6297	41.9253	54.5927	52.3712
+/+	+/-	6355	2933	46.1526	43.808	50.0865	44.5633
+/-	+/-	6080	2715	44.6546	41.7434	47.023	45.1974
+/-	+/-	6437	2938	45.6424	44.0423	49.4485	43.4364
+/-	+/-	6176	2816	45.5959	42.649	50.4696	43.669
+/-	+/-	6861	2906	42.3553	41.1893	45.1246	40.7521
+/-	+/-	6390	2903	45.4304	42.3005	50.5164	43.4742
+/-	+/-	5923	2835	47.8643	43.1032	52.2708	48.2188

## Sheet: Fig 9
Fgf20_genotype	Sox2_genotype	Ki67+/Sox2+ cells
+/-	ysb/+	2
+/-	ysb/+	1
+/-	ysb/+	0
+/-	ysb/+	7
+/-	ysb/ysb	7
+/-	ysb/ysb	19
+/-	ysb/ysb	16
+/-	ysb/ysb	7
-/-	ysb/+	3
-/-	ysb/+	3
-/-	ysb/+	8
-/-	ysb/+	7
-/-	ysb/ysb	17
-/-	ysb/ysb	9
-/-	ysb/ysb	14
-/-	ysb/ysb	8
